1 **The Impact of the Performance-Based Financing Project: An Observational Panel Study**  
2 **on Health Workers' Output in Rural Mezam, Northwest Region, Cameroon.**

3 Therence Nwana Dingana<sup>1,3</sup>, Balgah Roland Azibo<sup>2</sup> Daniel Agwenig Ndisang<sup>1</sup> Stewart Ndutard  
4 Ngasa<sup>3,4</sup>, Leo Fosso Fozeu<sup>5</sup>,

5 1. Tubah District Hospital, Regional Delegation of Public Health, Northwest Region,  
6 Cameroon

7 2. College of Technology, University of Bamenda

8 3. Medical Research and Careers Organisation

9 4. The Spinney, Elysium Healthcare, Manchester, United Kingdom

10 5. Ndop District Hospital, Regional Delegation of Public Health, Northwest Region,  
11 Cameroon

12 **ABSTRACT**

13 Performance-Based Financing (PBF) has been implemented in many countries to improve  
14 healthcare access, quality, and outcomes while ensuring the efficient and equitable allocation  
15 of resources within the healthcare system. However, very little effort is visible in assessing its  
16 real impacts. This study evaluates the impact of the PBF project on health workers' output and  
17 healthcare quality in the Mezam division in the North West region of Cameroon between 2012  
18 and 2022. Specifically, the study aims to understand health workers' perceptions of the PBF  
19 project, analyze the effect of PBF on health workers' output, and examine the impact of PBF  
20 on healthcare quality. A structured questionnaire was used to generate panel data among  
21 healthcare workers in six beneficiary health districts in the study site. The perception scores  
22 were estimated based on the Net Promoter Score (NPS) methodology and variability tested  
23 using ANOVA. Health workers' output and performance indicators were analyzed using the  
24 chi-square test, assessing the relation between PBF introduction and changes in health workers'

25 output, while healthcare quality metrics were analyzed using the Mann-Whitney U test to  
26 compare healthcare quality before and after PBF implementation. The results showed that  
27 health workers' perceptions varied but were generally positive, with a Net Promoter Score  
28 (NPS) of approximately 48.25. PBF significantly boosted health workers' output ( $p = 0.002$ )  
29 and healthcare quality ( $p < 0.05$ ). It can be concluded that the PBF project in the Mezam  
30 division had positive effects on workers' output and healthcare quality. Given the positive  
31 impacts, the study recommends scaling up PBF initiatives in Cameroon and other African  
32 countries with precarious health systems. Our study demonstrates the relevance of impact  
33 assessments in providing evidence for making informed decisions on efficient resource  
34 allocation in the health sector.

35 **Keywords:** *Cameroon, Healthcare Quality, Impact assessment, Northwest Region,*  
36 *Performance Based Financing, Workers output.*

37

## 38 INTRODUCTION

39 Access to health is central to human survival. Its emphasis among the Sustainable Development  
40 Goals (SDGs), particularly SDG 3, which aims to ensure healthy lives and promote well-being  
41 for all ages is justified. Achieving this goal necessitates significant investment in health  
42 initiatives, especially in developing countries where health systems are largely inadequate (1).  
43 Low- and middle-income countries (LMICs) face increasing healthcare demands but have  
44 limited financial resources, allocating only 5-7% of GDP to healthcare compared to 12.5% in  
45 high-income countries (2). Sub-Saharan African (SSA) countries spend even less: not more  
46 than 4-5% of the GDP (3). Universal Health Coverage (UHC) is a key strategy to optimize  
47 health sector expenditure and achieve SDG 3 by 2030 (4), particularly in SSA, where over 408  
48 Million of the 600 Million people in Africa who lack access to basic health care services are  
49 lodged (5); (6). This involves cost-effective, context-specific strategies such as health  
50 financing, health insurance, prepayment schemes, and innovative provider payment  
51 mechanisms (7); (8); and (9).

52 Performance-Based Financing (PBF), also known as Result-Based Financing or Pay for  
53 Production, is a health financing scheme designed to increase the quality and quantity of  
54 healthcare services by linking payments in health facilities based on performance (10); (11).  
55 Performance-Based Financing (PBF) is a health financing approach used to improve the  
56 quantity and quality of healthcare services in low- and middle-income countries (LMICs) by  
57 linking financial rewards to predefined targets (12). This approach incentivizes healthcare  
58 providers, thereby promoting better performance (7). PBF enhances the autonomy of  
59 healthcare facilities and involves a comprehensive performance framework, including  
60 regulatory functions, contract development and verification agencies, and community  
61 empowerment initiatives (13) (14). It aims to contain costs and ensure sustainable revenue  
62 through a mix of cost recovery, government contributions, and international support (15)

63 In Cameroon, PBF targets health facilities and workers, aiming to improve healthcare service  
64 utilization and quality at various system levels (16) (17). Research has shown that health  
65 workers receiving PBF payments reported feeling motivated by performance bonuses, leading  
66 to improvements in working environments, including enhanced supervision and availability of  
67 essential resources (18). Both financial and non-financial performance-based incentives have  
68 been found to boost health worker motivation and performance in various settings  
69 (19). However, the actual impact of PBF schemes on achieving better healthcare quality  
70 outcomes remains uncertain (20) (21). Supported by major international donors such as the  
71 WHO, World Bank, and USAID, PBF programs have shown potential in improving service  
72 coverage and quality in various LMICs, despite some challenges like resource allocation and  
73 evaluation issues (22) (23). Evaluations in countries like Rwanda, Argentina, Cambodia,  
74 Tanzania, and Zambia have highlighted PBF's potential to enhance service coverage and  
75 quality (24) (25) (26).

76

77 This study examines the effects of PBF on health workers' output in Mezam division,  
78 Northwest Region of Cameroon, an area with unique healthcare challenges, including  
79 inadequate infrastructure, insufficient personnel, and disparities in urban-rural healthcare  
80 access (4). Healthcare workers in Mezam operate in resource-constrained environments with  
81 limited training, equipment, and motivation. Ensuring their motivation and high-quality care  
82 delivery is crucial to improving health outcomes in the region.

83 The global focus on health challenges in LMICs has intensified with the onset of the sustainable  
84 development goals on universal health and well-being toward 2030 (27). Strengthening health  
85 systems in these regions like SSA, is crucial but complicated by limited resources (28).  
86 Cameroon faces a low health worker-to-patient ratio, with approximately 0.4 physicians and  
87 1.6 nurses per 1,000 people, which is below the regional average (1). Dissatisfaction with

88 wages has led to abandonment of duties, strikes; necessitating the government and World Bank  
89 to introduce the PBF program in 2011 to improve healthcare delivery (29). Despite its scale-  
90 up to national policy by 2019, the program's impact in the conflict-affected Northwest region  
91 remains under-evaluated. This study aims assesses the effects of PBF on health workers' output  
92 in Mezam division in the North West region of Cameroon as a first step in reducing this existing  
93 research gap. Specifically, the study seeks to understand health workers' perception of the PBF  
94 project, analyze the effects of PBF on health workers' output and assess the impact of PBF on  
95 the quality of healthcare in the study area.

96 Three hypotheses guide the study as follows:

97 H1 There is a significant improvement in health workers' perception of the PBF project.

98 H2 PBF has a positive impact on health workers' output in beneficiary health centers.

99 H3 There is a significant difference in the quality of healthcare services before and after  
100 implementing PBF in the study site.

101 The contribution of this study is twofold. First, it adds to the slow-growing empirical studies  
102 on the effects of PBF on the health sector in SSA. By examining how PBF influences healthcare  
103 workers' productivity and care quality, providing critical data for quality improvement and  
104 evidence-based decision-making. By examining the intricate interplay between PBF and health  
105 worker performance in Mezam, this study aspires to contribute to the achievement of Universal  
106 Health Coverage (UHC) and the Sustainable Development Goals (SDGs) (15). The findings  
107 will guide policymakers, healthcare administrators, and funding agencies in optimizing health  
108 investments and financing strategies. Second, the study reiterates the relevance and nuances of  
109 undertaking impact assessment of health care projects.

110 This article proceeds as follows. The next section reviews the literature on health workers'  
111 perceptions of PBF. As will be observed, health workers generally have positive perceptions

112 of PBF projects. This is followed by an overview of the topical literature on the effect of PBF  
113 on health workers' output and quality of care. PBF increases productivity and health service  
114 utilization and drives health workers' performance compared to the situation in its absence.

### 115 **Health workers' perception of Performance Based Financing**

116 Health workers in beneficiary health units perceive the PBF project positively but with nuanced  
117 views shaped by various factors. Bhatnagar & George found out that PBF payments enhanced  
118 their working environments, including better supervision and availability of essential drugs,  
119 creating a positive influence (18). The need to understand the complex motivational  
120 mechanisms at play has been highlighted, as PBF impacts health workers' attitudes and  
121 behaviors. In Zambia, PBF improved job satisfaction and retention rates, indicating a favorable  
122 reception (30). Gergen reported that improved resources and management support in  
123 Mozambique fostered self-efficacy and pride among health workers (31). It has been  
124 emphasized that leadership and organizational capacity in Burkina Faso significantly  
125 influenced health workers' motivational reactions (10). Overall, PBF is generally perceived  
126 positively, enhancing motivation and work conditions, though its effectiveness is contingent  
127 on supportive organizational contexts.

### 128 **Effect of Performance based financing on health workers' output and quality of care.**

129 PBF positively impacts health workers' output by providing financial incentives, strengthening  
130 management, and enhancing clinical capacities through regular supervisions (21). In Benin, a  
131 study found that PBF motivates health workers and fosters a culture of continuous  
132 improvement, leading to better performance (32). Similarly, PBF has been shown to increase  
133 productivity and health service utilization by encouraging health workers to meet performance  
134 targets (33). In Tanzania, training programs associated with PBF have been observed to  
135 improve the quality of healthcare delivery. Studies conducted in Burkina Faso have reiterated  
136 that PBF incentivizes health workers to meet specific goals, thereby enhancing their output and

137 the quality of care (34). Additionally, research in Zambia emphasized the importance of  
138 understanding the mechanisms through which PBF influences satisfaction, motivation, and  
139 retention of health workers (30). Overall, PBF enhances health workers' performance by  
140 aligning incentives with performance targets and investing in supportive mechanisms such as  
141 training and supervision.

## 142 **MATERIALS AND METHODS**

### 143 **Background of Study Area**

144 This study was carried out in Mezam, the central and most populated division in the Northwest  
145 region of Cameroon. It has 654,659 inhabitants (35), 62 health areas, and 1,480 health workers  
146 (36). The region is currently emerged in a socio-political crisis that turned violent in November  
147 2016, causing significant displacement and affecting livelihoods (37), including access to  
148 healthcare services. The healthcare workforce ratios in Mezam division are below WHO  
149 recommendations, with 1 doctor per 4,340 people and 1 nurse per 1,592 people (38). Access to  
150 healthcare facilities varies, with some residents traveling long distances for services (17).  
151 Health insurance coverage remains limited, with many relying on out-of-pocket payments (39).  
152 The healthcare infrastructure includes a mix of public and private facilities, with urban areas  
153 generally better equipped. Mezam faces various health challenges, including infectious  
154 diseases and maternal and child health issues. The scaling up of the PBF project in 2018 was  
155 anticipated to boost the collapsing health system (4).

### 156 **Study Design**

157 This quantitative panel study involved healthcare providers (nurses, midwives, doctors,  
158 laboratory technicians) who worked before and during the PBF implementation. The panel  
159 study method was chosen to examine changes in healthcare workers' perceptions, output, and

160 healthcare quality over time. A total of 315 health workers in 20 health facilities were selected  
161 using a multi-stage stratified random sampling approach.

## 162 **Population and Sampling**

163 The study population included healthcare workers from Mezam Division who had worked both  
164 before and during the PBF implementation. Those with PBF experience outside the Northwest  
165 region or who worked only during the PBF period were excluded. Workers transferred within  
166 Mezam Division with PBF experience were included, ensuring a comprehensive understanding  
167 of both periods. A multistage sampling design was used to ensure representativeness in  
168 recruiting participants. First, Mezam Division was purposefully chosen due to its relevance as  
169 the PBF project's focus area. Sixteen public, private, and confessionnal health centers actively  
170 engaged in the PBF project were then purposively selected to ensure diversity. Next, they were  
171 categorized into rural and urban strata and sampled proportionally. Health workers were  
172 selected based on stratified sampling to ensure specialty representation. In centers with more  
173 than five specialties, at least four were selected, with at most five participants per specialty  
174 included, with a cap of 20 total participants per facility. The sample size was determined using  
175 Taro Yamane's formula for finite populations  $n = N / \{(1 + N (e)^2)\}$ . With a total of 1,480  
176 healthcare workers and a significance level of 0.05, the sample size was calculated to be 315  
177 health workers. A proportionate fraction per health district based on the total number of health  
178 workers was used for participant recruitment.

## 179 **Method and Source of Data Collection**

180 Data were collected between mid-May and mid-July 2023, using a structured questionnaire,  
181 pre-tested for clarity and reliability. The questionnaire covered identification details of  
182 healthcare workers and facilities, socio-demographic characteristics (age, gender, education,  
183 and experience), perceptions of the PBF project, its effects on healthcare workers' output, and  
184 its impact on healthcare quality. Face-to-face interviews were conducted by trained field staff,



185 ensuring consistent questionnaire administration. Interviews were conducted privately to  
186 promote honest responses, and all answers were recorded for analysis. This method allowed  
187 the collection of comprehensive data on the PBF project's influence on performance and  
188 healthcare delivery. Both primary data (questionnaire responses) and secondary data (books,  
189 reports, journal articles) were used. Primary data provided specific insights, while secondary  
190 data offered a broader theoretical context.

### 191 **Validity and reliability**

192 Content validity was ensured through expert review and a pilot study to refine the  
193 questionnaire. The instrument was examined and modified to achieve 98% validity.

194 Reliability was tested through a pilot study with five questionnaires administered to Tubah  
195 district hospital staff. The analysis confirmed the questionnaire's reliability.

### 196 **Data Analysis**

197 To evaluate perceptions, mean perception scores were calculated, and the net perception score  
198 was used for the final analysis. The significance of its variability by socio-demographic  
199 characteristics was tested using the ANOVA test. The Chi-square test assessed the association  
200 between PBF and health workers' output. The Mann-Whitney U test compared healthcare  
201 quality before and after PBF implementation.

### 202 **Ethical Consideration**

203 Ethical clearance was obtained from the Regional Ethical Committee for Human Health  
204 Research Northwest Region. Administrative clearance and verbal consent from health facility  
205 heads were also secured. Participants were informed about the study's aim and their voluntary  
206 participation. Confidentiality was ensured, and data were stored in a password-protected  
207 database accessible only to the primary researcher and supervisor.

208

## 209 **RESULTS AND DISCUSSION**

### 210 **RESULTS**

#### 211 **Socio-demographic characteristics**

212 The study sampled 315 health workers in the Mezam division. A face-to-face questionnaire  
213 was administered. Descriptive data collected was then analyzed and is presented thus; The  
214 study sample of 315 healthcare workers was mainly from Bamenda (41.9%), followed by  
215 Tubah (16.2%) and Santa (15.2%). The majority were aged 30–39 years (37.8%), with 25.1%  
216 under 30. Most participants were female (74.6%). Educationally, 63.2% had university degrees,  
217 19.4% held post-graduate qualifications, 14.0% had secondary education, and 3.5% had  
218 primary education. Professionally, nurses comprised 61.3% of the sample, while laboratory  
219 technicians (8.3%), midwives (11.4%), and medical doctors (2.5%) were less common. Other  
220 roles included biomedical technicians/imaging (1.0%) and auxiliary staff (15.6%).

#### 221 **Healthcare Worker Characteristics Before and with Performance Based Financing**

222 The study examined health practitioners' employment status and other demographic factors  
223 before and after the introduction of the PBF program (Table 1). Government employment  
224 increased from 40.3% to 45.4%, while private sector employment dropped from 48.9% to 40%.  
225 Employment in confessional sectors rose from 10.8% to 14.6%. Health centers saw a decrease  
226 in workforce, from 24.1% to 18.1%, and MHCs from 17.5% to 12.4%, while district hospitals  
227 and regional hospitals saw increases of 4.8% and 7.3%, respectively. Christian respondents  
228 slightly declined, while Muslim representation increased. Marital status shifts included a rise  
229 in married respondents from 56.5% to 61% and a decrease in singles from 39.4% to 34.6%.  
230 Longevity in years of service saw a shift from a median of 5 years pre-PBF to 9 years post-  
231 PBF, with increased experience among respondents. Monthly incomes also rose, with median  
232 income increasing from 60,000fcfa to 75,000fcfa post-PBF. Practitioners earning less than  
233 50,000 FCFA dropped from 23.2% to 13%, while those earning over 200,000 FCFA rose from

234 1.3% to 4.8%. Household sizes largely remained the same, but the number of households with  
235 more than six persons increased.

236 The median "quote part" income rose from 25,000fcfa to 30,000fcfa. The term "quote part" in  
237 the context of health workers typically refers to a portion or share of something, often financial  
238 incentives or rewards, that is allocated to individual health workers based on certain criteria or  
239 performance indicators. In the context of Performance-Based Financing (PBF) or similar  
240 incentive programs, a "quote part" for health workers would represent the portion of the  
241 financial incentives or bonuses that each health worker is entitled to receive based on their  
242 performance in achieving predefined targets and objectives.

### 243 **Healthcare workers' perceptions and attitudes toward the Performance Based Financing** 244 **project**

245 An assessment of practitioners' perceptions of the PBF revealed diverse opinions as presented  
246 in Table 2 Perception of Performance Based Financing

247 **Error! Reference source not found..Error! Reference source not found.** Of the  
248 practitioners, 8.6% were very unsatisfied, 24.1% were just satisfied, 33.3% were neutral, 26%  
249 were satisfied, and 7.9% were very satisfied. The majority were neutral or just satisfied.  
250 Regarding emotions during the PBF period, 5.7% were very unexcited, 16.5% were unexcited,  
251 35.6% were neutral, 32.1% were excited, and 10.2% were very excited, with most being neutral  
252 or excited. For ease of adaptability, 7.3% found it very difficult, 29.5% found it difficult, 22.5%  
253 were neutral, 35.2% found it easy, and 5.4% found it very easy, indicating it was generally easy  
254 to implement PBF. In terms of appropriateness, 8.3% found it very inappropriate, 12.4%  
255 inappropriate, 14.9% neutral, 51.4% appropriate, and 13% very appropriate. Regarding future  
256 recommendations, 8.3% were very unlikely to recommend PBF, 12.1% unlikely, 11.1%

257 neutral, 45.1% likely, and 23.5% very likely, showing a positive inclination towards  
258 recommending PBF.

259 To calculate the Net Promoter Score (NPS) based on the provided survey responses, we need  
260 to categorize the scores as follows: Scores of 1 and 2 are considered "Distractors." A score of  
261 3 is classified as "Passives." Scores of 4 and 5 are labeled as "Promoters."

262 The NPS for the question "How likely are you to recommend PBF in the future?"

263 Distractors:  $26 (\text{score } 1) + 38 (\text{score } 2) = 64$

264 Passives:  $35 (\text{score } 3)$

265 Promoters:  $142 (\text{score } 4) + 74 (\text{score } 5) = 216$

266 Calculate the percentage of Promoters by subtracting the percentage of Distractors from the  
267 percentage of Promoters:

268  $\text{NPS} = (\text{Promoters} - \text{Distractors}) / \text{Total Responses} * 100.$

269  $\text{NPS} = (216 - 64) / (216 + 35 + 64) * 100$   $\text{NPS} = 152 / 315 * 100$   $\text{NPS} \approx 48.25$

## 270 **Perception of Performance Based Financing**

271 Assessing the entirety of results pertaining to the perception of health practitioners as per the  
272 PBF program (Table 3), the researcher realized that 62(19.7%) of the respondents perceived  
273 PBF as good, 169(53.7%) of the respondents perceived it as poor and 84(26.7%) of the  
274 respondents perceived it as very poor. With the modal score between 60-70%, one could  
275 conclude that; overall, the health practitioners perceived PBF as poor in enhancing output of  
276 health practitioners.

277 **Perceptions of Performance Based Financing based on various demographic and**  
278 **professional characteristics**

279 The assessment of PBF perception by health practitioners revealed varied scores across districts  
280 and demographics (Table 4). In Bafut, 52% rated PBF very poor, while 52.6% in Bali and  
281 58.3% in Bamenda scored it as poor. Nkwen had 45% rating it poor, Santa had 56.3%, and  
282 Tubah had 51%. Across age groups, those under 30 (69.6%) and those aged 30-39 (45.4%)  
283 predominantly scored PBF as poor. Gender-wise, 42.5% of males and 57.4% of females rated  
284 PBF as poor. Regarding education, 55.8% of university-educated practitioners and 63.9% of  
285 postgraduates scored PBF poorly. Functionally, 56.5% of nurses and 75% of doctors had  
286 negative scores. Overall, PBF received poor scores across districts, age groups, genders,  
287 education levels, and functions.

288 **The effect of PBF on health workers' output**

289 The data on Table 5 shows significant shifts in how respondents rated their output before and  
290 during the PBF implementation across key variables. For general workload, high and very high  
291 ratings increased from 26% before PBF to 66.9% during PBF, while ratings for very low, low,  
292 and acceptable workloads dropped from 73.9% to 33%. High and very high ratings for monthly  
293 patient consultations surged from 43.8% before PBF to 78.1% during PBF, with low and  
294 acceptable consultations falling from 56.2% to 21.9%. Monthly admissions rated high and very  
295 high rose from 33% before PBF to 63.5% during PBF, with lower ratings decreasing from 67%  
296 to 36.5%. For monthly deliveries, high and very high ratings increased from 32.7% before PBF  
297 to 61.6% during PBF, while lower ratings fell from 67.3% to 38.4%. Community interventions  
298 saw high and very high ratings rise from 21.6% before PBF to 50.5% during PBF, with lower  
299 ratings declining from 78.4% to 49.5%. High and very high financial incentives increased from  
300 9.8% before PBF to 33% during PBF, while lower incentives dropped from 90.2% to 67%.  
301 Overtime ratings for high and very high levels grew from 32.4% before PBF to 59.7% during

302 PBF, with lower overtime ratings decreasing from 67.6% to 40.3%. No significant change was  
303 noted in monthly mortality rates ( $p=0.055$ ), although very low mortality rates were slightly  
304 higher during PBF (38.4%) compared to before PBF (34.6%). Overall, respondents indicated  
305 increased activity and output during the PBF period, with higher ratings for workloads,  
306 consultations, admissions, deliveries, community interventions, financial incentives, and  
307 overtime.

### 308 **The effects of Performance Based Financing on healthcare quality**

309 The PBF project significantly positively impacted various quality indicators as rated by health  
310 practitioners (Table 6) For patient waiting times, the number of respondents reporting wait  
311 times under 30 minutes increased from 35.6% before PBF to 55.9% during PBF, while those  
312 reporting over 60 minutes decreased from 25.7% to 14%. Hospital cleanliness improved  
313 markedly, with ratings of 'very clean' increasing from 12.1% before PBF to 50.2% during PBF  
314 and 'very dirty' dropping from 16.2% to 0.3%. Equity of care saw substantial improvements,  
315 with high and very high ratings rising from 38.7% before PBF to 73.4% during PBF. Assiduity  
316 ratings also improved, with high and very high levels increasing from 30.8% to 74% during  
317 PBF. Patient reception quality saw a similar trend, with high and very high ratings rising from  
318 31.4% to 70.8%. Self-efficacy among health practitioners improved, with high and very high  
319 levels increasing from 38.5% to 76.5%. Infrastructural development ratings improved  
320 significantly, with high and very high levels rising from 34.3% to 77.1% during PBF. Patient  
321 extortion and embezzlement ratings showed a notable decrease, with high and very high levels  
322 dropping from 25.7% to 9.5%. Overall, the PBF project led to considerable enhancements in  
323 the quality of healthcare delivery as perceived by health practitioners.

### 324 **Effect of Performance based Financing on Healthcare Quality**

325 Scoring the quality of the results obtained as a result of the PBF project, the results were  
326 grouped and scored under the brackets of good (80%), poor (60%-79%), and very poor (<60%).

327 Table 7 shows that Good quality ratings increased from 17.8% before PBF to 59.4% during  
328 PBF. Poor quality scores dropped from 41.9% to 36.2%, and very poor ratings decreased from  
329 40.3% to 4.4%. This demonstrates that the PBF project significantly improved service quality  
330 in the health districts.

### 331 **Summary of findings**

332 This study examines the impact of PBF on healthcare workers in the Mezam Health District of  
333 Cameroon, revealing significant demographic and professional insights. Predominantly  
334 female, the surveyed group had a substantial number holding university degrees, including  
335 nurses, lab techs, midwives, and doctors. Perceptions of PBF varied by district, age, and role,  
336 with nurses and lab techs viewing it more positively although many view PBF as a poor  
337 strategy, PBF led to increased workloads, more patients consulted, admitted, and delivered,  
338 and expanded community interventions. Financial incentives improved, albeit with increased  
339 overtime. Importantly, PBF enhanced healthcare quality, reducing patient waiting times and  
340 improving hospital cleanliness, equity of care, assiduity, patient reception quality, self-  
341 efficacy, and infrastructural development while significantly decreasing patient extortion and  
342 embezzlement. Overall, the study underscores PBF's potential to boost healthcare worker  
343 performance and service quality despite increased workloads.

## 344 **DISCUSSION OF FINDINGS**

### 345 **Socio-Demographics**

346 The study identified significant demographic variations among healthcare workers in Mezam  
347 across districts, age groups, and gender. Bamenda had the highest number of healthcare  
348 workers (41.9%), while Bafut had the lowest (7.9%), reflecting proportional sampling, as was  
349 done in Ghana (40).

350 Most healthcare workers were aged 30-39 years (37.8%), consistent with trends in sub-Saharan  
351 Africa (41). Females made up the majority of the workforce (74.6%), aligning with the global  
352 trend of female dominance in nursing and midwifery (1), likely due to a natural inclination  
353 towards caregiving roles. The majority of healthcare workers had university degrees (63.2%),  
354 with 19.4% holding postgraduate qualifications, reflecting the high educational requirements  
355 of the field. This distribution is consistent with findings from LMICs, such as Ethiopia (42).  
356 Among healthcare functions, nurses were the most prevalent (61.3%), followed by Auxiliaries  
357 (15.6%) and Midwives (11.4%), aligning with global trends where nursing constitutes a  
358 significant portion of the healthcare workforce (43).

359 During PBF, the distribution of healthcare workers by employer type showed minor changes,  
360 with a slight increase in government employment and decreases in the private sector and  
361 confessional organizations, though these shifts were not statistically significant ( $p = 0.062$ ).  
362 Similar studies in low- and middle-income countries (LMICs) have also noted changes in  
363 employment patterns following health system reforms (44). Conversely, the distribution by  
364 healthcare facility type changed significantly, with more workers in district and regional  
365 hospitals and fewer in health centers ( $p = 0.019$ ), reflecting trends observed in LMICs where  
366 workers favor better-equipped facilities (45). Marital status remained stable, with a slight  
367 increase in married workers ( $p = 0.607$ ), potentially due to job stability (46). The religious  
368 composition shifted significantly towards more Christian workers ( $p = 0.046$ ), while longevity  
369 and income also increased, correlating with job satisfaction and financial incentives (47); (48).  
370 Household sizes grew significantly  $p < 0.001$ , possibly due to factors like time and  
371 displacement due to the sociopolitical crisis (49)

372 **Healthcare workers' perceptions and attitudes toward the Performance Based Financing**  
373 **project**



374 Healthcare workers expressed mixed feelings regarding whether their expectations from  
375 Performance-Based Financing (PBF) were met, with 33.3% remaining neutral and others  
376 showing varying satisfaction levels. This aligns with findings from other PBF programs,  
377 indicating diverse expectations and experiences among healthcare workers (50). During the  
378 PBF period, emotional responses varied: 35.6% felt "Neutral" while 32.1% were "Excited,"  
379 reflecting the complexity of PBF implementation, where some embraced changes and financial  
380 incentives while others faced uncertainties (13). The importance of leadership and  
381 organizational capacity in shaping health workers' reactions to PBF is vital (34).

382 Opinions on the ease of implementing and adapting to PBF principles were also mixed; 35.2%  
383 found it "Easy" while 29.5% found it "Difficult." This highlights the need for effective training  
384 and support to help healthcare workers transition smoothly (22). Regarding PBF's  
385 appropriateness for healthcare, 51.4% deemed it "Appropriate," but 12.4% viewed it as  
386 "Inappropriate," suggesting that contextual factors influence perceptions (50). Similar studies,  
387 such as those by (22) in Rwanda, showed more positive views, highlighting the importance of  
388 context. In terms of future recommendations, 45.1% were "Likely" to recommend PBF, while  
389 12.1% were "Unlikely," suggesting both potential endorsement and concerns that need  
390 addressing for PBF's broader acceptance (50).

391 The calculated Net Promoter Score (NPS) of approximately 48.25% suggests a positive  
392 perception of PBF among healthcare workers, with more promoters than detractors. This  
393 positive NPS suggests that, based on the responses to the question about perception of PBF,  
394 there is a higher percentage of promoters than detractors, indicating that healthcare workers  
395 generally have a positive perception of PBF. The positive perception of PBF among healthcare  
396 workers have been noted in various settings (51). Moreover, the usability and acceptance of  
397 PBF among health workers can be improved by ensuring timely and adequate payouts of  
398 performance-based payments (52).

399 **Perceptions of Performance Based Financing based on various demographic and**  
400 **professional characteristics**

401 This study examined healthcare workers' perceptions of PBF across different demographic and  
402 professional characteristics, focusing on health district, age, sex, education level, and  
403 occupation. Perceptions varied significantly by health district, possibly due to differences in  
404 PBF implementation strategies, stakeholder engagement, cultural norms, and socio-economic  
405 conditions. Health facilities with stronger systems viewed PBF positively, while weaker ones  
406 saw it as burdensome, aligning with findings by (53) and (34)

407 Younger healthcare workers tended to be more critical of PBF, potentially due to their  
408 technological proficiency and expectations for participation and innovation. In contrast, adults  
409 had mixed opinions, influenced by their experience with similar systems and less technological  
410 familiarity (54); (41). Gender differences also emerged: males had more negative perceptions,  
411 citing concerns about accountability, equity, and job security, while females viewed PBF more  
412 positively, valuing competition, rewards, and gender equality (55); (56); (41).

413 Education level influenced perceptions, with more educated healthcare workers showing  
414 positive views due to a better understanding of funding challenges and alignment with  
415 organizational goals (57). However, contrary to (42) doctors generally had negative  
416 perceptions, possibly due to concerns about quality care, administrative burden, and  
417 misalignment of goals, while nurses and lower-level staff were more positive.

418 Overall, the study noted significant variations in perceptions across demographic groups,  
419 similar to findings by (22) in Rwanda, where healthcare workers generally viewed PBF  
420 positively, and (50) who found mixed responses in a multi-country study. While PBF can  
421 motivate health workers to improve care quality, certain barriers beyond their control can  
422 hinder the effectiveness of these programs (58). The relationship between financial incentives

423 and health worker motivation is complex, as evidenced by the need to consider various factors  
424 influencing workers' reactions to PBF initiatives (59)

#### 425 **The effect of Performance Based Financing on health workers' output**

426 General workload increased under PBF, with more health workers reporting a "High" workload  
427 compared to the "Acceptable" levels before PBF ( $p < 0.001$ ). This finding contrasts with some  
428 literature suggesting that PBF can enhance resource allocation efficiency (60), likely due to  
429 local contextual factors. The average number of patients consulted monthly also rose  
430 significantly, with a shift from "Acceptable" to "High" patient loads ( $p < 0.001$ ), aligning with  
431 studies in Tanzania and Zambia that found increased service delivery due to PBF (24); (61)

432 Similarly, monthly admissions and deliveries saw significant increases ( $p < 0.001$ ), driven by  
433 PBF's focus on equity and promoting facility-based care. Community interventions and  
434 financial incentives also improved, indicating that PBF incentivizes engagement and rewards  
435 performance (22); (62); (63). However, the monthly mortality rate showed no significant  
436 change ( $p = 0.055$ ), suggesting that increased service delivery did not immediately translate  
437 into improved mortality. However, there could be a reduction in community death.

438 PBF significantly increased overtime levels, with many health workers reporting "High"  
439 overtime ( $p < 0.001$ ), which raises concerns about the potential negative impact on their well-  
440 being and work-life balance (24). These results echo findings from other studies, showing that  
441 while PBF can enhance health worker output and service quality, its effectiveness varies across  
442 different settings and is influenced by contextual factors, financial incentives, and facility  
443 capacity/application (25); (23); (64)

444 The implementation of PBF in Mezam has had a significant positive impact on various aspects  
445 of healthcare quality. Notably, PBF led to a substantial reduction in patient waiting times, with  
446 55.9% of patients experiencing waits of less than 30 minutes during PBF compared to 35.6%

447 before ( $p < 0.001$ ). Hospital cleanliness also improved, with more respondents perceiving  
448 facilities as "Clean" or "Very Clean" during PBF ( $p < 0.0001$ ), contrasting with some literature  
449 suggesting inefficient use of PBF funds for infrastructure (62); (21); (32); (33)

450 PBF also positively impacted the perceived equity of care, with a significant increase in ratings  
451 of "High" equity ( $p < 0.001$ ), supporting findings from (65). The assiduity, or diligence, of  
452 healthcare workers improved, with higher perceptions of diligence during PBF ( $p < 0.001$ ),  
453 aligning with studies by (22). Furthermore, the quality of patient reception and healthcare  
454 workers' self-efficacy saw significant boosts during PBF, reflecting increased patient  
455 satisfaction and worker confidence ( $p < 0.001$ ).

456 Infrastructure development perceptions also improved significantly during PBF ( $p < 0.001$ ),  
457 suggesting effective use of funds contrary to some previous findings (62). Moreover, PBF was  
458 associated with a marked reduction in patient extortion and embezzlement, with 52.4%  
459 reporting "Very Low" occurrences during PBF ( $p < 0.001$ ), aligning with studies highlighting  
460 PBF's role in reducing corruption ((60); (66). These findings reflect the potential of PBF to  
461 enhance healthcare service quality and efficiency, echoing similar outcomes observed in  
462 Rwanda and other settings (22); (14). However, contextual factors and implementation  
463 challenges must be considered, as mixed results have been reported in other studies (12)

#### 464 **Validation of Hypotheses**

465 Hypothesis 1, suggesting no difference in health workers' perceptions based on demographics,  
466 was rejected. Findings showed significant variations in perceptions influenced by health  
467 district, age, and education level, with more educated workers viewing PBF more positively.  
468 We therefore reject the null hypothesis and conclude that there are significant variations in  
469 perceptions of Performance Based Financing.

470 Hypothesis 2, proposing no relationship between PBF implementation and health workers'  
471 output, was also rejected. Significant differences in workload, patient load, admissions, and  
472 financial incentives between "Before PBF" and "During PBF" periods indicated a clear impact  
473 of PBF on output. Therefore, we rejected the null hypothesis and concluded that there were  
474 significant differences in workload, patient load, admissions, and finances before and during  
475 the performance-based financing project's implementation.

476 Hypothesis 3, which posited no difference in healthcare quality before and after PBF.  
477 Statistically significant improvements were observed in patient waiting times, cleanliness,  
478 healthcare equity, and reductions in patient extortion and embezzlement, demonstrating that  
479 PBF positively affected healthcare quality. The null hypothesis was thus rejected and the study  
480 concludes that there are statistically significant differences in healthcare quality before and  
481 During the Performance Based funding implementation process.

## 482 **CONCLUSION AND RECOMMENDATIONS**

### 483 **Conclusion**

484 The study reveals that health workers in Mezam have a generally positive perception of the  
485 PBF project, viewing it as a beneficial initiative that enhances their motivation, job satisfaction,  
486 and performance, largely due to the financial incentives provided. These incentives play a  
487 crucial role in boosting productivity, as evidenced by increased patient consultations,  
488 admissions, deliveries, and community interventions. Moreover, the PBF project positively  
489 impacts healthcare quality, with health workers reporting greater adherence to clinical  
490 protocols and improved care delivery. The emphasis on quality assurance and regular  
491 monitoring within the PBF framework further supports these positive outcomes.

492 **Recommendations**

493 Several key recommendations can be made Based on the study's findings on the impact of the  
494 PBF project in Mezam Health District. First, sustaining and expanding the PBF project is  
495 essential, as it has positively influenced healthcare worker output and service quality; ongoing  
496 adjustments based on performance metrics and feedback should be implemented to enhance its  
497 effectiveness further. Second, optimizing workload management is crucial to address the  
498 increased demands associated with PBF; strategies such as hiring more staff, improving  
499 scheduling systems, and providing training can help ensure efficient workload distribution and  
500 prevent burnout. Third, enhancing financial incentives is necessary, as the increase in overtime  
501 suggests a need to review the incentive structure to motivate workers without leading to  
502 excessive hours, thereby promoting a healthy work-life balance. Fourth, continuing to focus on  
503 quality and equity is vital; efforts to improve cleanliness, patient reception, and equitable care  
504 should be maintained alongside robust mechanisms to monitor and address any issues related  
505 to patient extortion and embezzlement. Fifth, integrating the PBF model into the Universal  
506 Health Coverage (UHC) policy presents an opportunity to leverage its success in improving  
507 healthcare quality and worker performance, supporting the expansion of UHC in Cameroon  
508 through targeted financial incentives that enhance both access to care and service quality. The  
509 study demonstrates that improvements in equity of care and system efficiency under PBF can  
510 guide policymakers in designing Universal Health Coverage strategies that address healthcare  
511 disparities, optimize resource use, and enhance trust in healthcare services through transparent  
512 financial systems.

## REFERENCES

- 513 1. World Health Organisation. world Health Statistics 2021: A Visual summary. 2021.
- 514 2. world Health Organisation. world Health statistics 2017: monitoring health for the SDGs. 2017.
- 515 3. *Trends in Health expenditure in the United states and Canada from 1996 to 2013: A tale of 2*  
516 *countries*. Lu, C., et al. 6, 2021, Health Affairs, Vol. 30, pp. 872-882.
- 517 4. World Health Organisation;. *Universal Health Coverage*. 2019.
- 518 5. *Performance-based financing in low and middle-income countries: A systematic review of its*  
519 *effectiveness in improving health outcomes*. Kellett, S. 11, s.l. :  
520 <https://doi.org/10.34172/ijhpm.2020.189>, 2020, International Journal of Health Policy and  
521 Management, Vol. 9, pp. 462-473.
- 522 6. *Performance-Based Financing: A review of the evidence and implications for health systems*. DFC.  
523 2021, DFC research paper, Vol. 2021/001.
- 524 7. *Performance Based incentives for health: A way to improve tuberculosis detection and treatment*  
525 *completion*. Cashin, C., Sparkes, S. and Bloom, D. 1, 2014, Health systems and Reforms, Vol. 1, pp. 66-  
526 74.
- 527 8. *Understanding Private general practitioners' perspectives on China's health reform*. Hood, C. M.,  
528 Goudge, J. and Su, Y. 1, 2018, International Journal for Equity in Health, Vol. 17, pp. 1-11.
- 529 9. Savedoff , W. D. and Hussmann, K. *Why are health systems prone to corruption?* Education. s.l. :  
530 Global corruption report, 2020.
- 531 10. *The importance of leadership and organizational capacity in shaping health workers' motivational*  
532 *reactions to performance-based financing: a multiple case study in burkina faso*. Fillol, A., et al. 5, s.l. :  
533 <https://doi.org/10.15171/ijhmp.2018.133>, 2019, International Journal of Health Policy and  
534 Management, Vol. 8, pp. 272-279.
- 535 11. *Healthcare digitalization and pay-for-performance incentives in smart hospital project financing*.  
536 Visconti, R. and Morea, D. 7, s.l. : <https://doi.org/10.3390/ijerph17072318>, 2020, International Journal  
537 of Environmental Research and Publiv Health, Vol. 17, p. 2318.
- 538 12. *Context matters(but how and why?) A hypothesis-led literature review of performance based*  
539 *financing in fragile and conflict-affected health systems*. P. Bertone, M. P., et al. 4, 2018, PLoS ONE,  
540 Vol. 13. e0195301.
- 541 13. *Performance-based financing for better quality services in Rwandan health centres: 3-years*  
542 *Experience*. Renmans, D., Holvoet N. and Orach, C. G. 4, 2017, Tropical Medicine & International  
543 Health, Vol. 22, pp. 348-356.
- 544 14. Witter, S., et al. Paying for performance to mprove the delivery of health interventions in low and  
545 middle-income countries. *Cochrane datavase of systemetic reviews*. 2012, p. 2.

- 546 15. Fritche, G. B., Soeters, R. and Meessen, B. Performance Based financing toolkit. [Online] 2014.  
547 <https://openknowledge.worldbank.org/handle/10986/17194>.
- 548 16. *Performance Based Financing: A Catalyst for improving Healthcare Services in Cameroon*. Njikam,  
549 O., Fofung, E. and Fomba, M. J. 2, 2021, Health Systems and Reforms, Vol. 7, pp. 115-120.
- 550 17. Ministry of Public Health Cameroon. *National Health development plan(2022-2026)*. Ministry of  
551 Public Health. 2022. [https://www.minsante.cm/site/?q=en/content/national-health-development-](https://www.minsante.cm/site/?q=en/content/national-health-development-plan-2022-2026)  
552 [plan-2022-2026](https://www.minsante.cm/site/?q=en/content/national-health-development-plan-2022-2026).
- 553 18. *MOtivating Health workers up to a limit: partia; effects of performance-based financing on working*  
554 *environments in Nigeria*. Bhatnagar, A. and George, A. 7, s.l. : <https://doi.org/10.1093/heapol/czw002>,  
555 2016, Health Policy and Planning, Vol. 31, pp. 868-877.
- 556 19. Aninanya, G., et al. Can performance-based incentives improve motivation of nurses and midwives  
557 in primary facilities in northern ghana? a quasi-experimental study. *Global Health Action*. 2016, Vol. 9,  
558 1.
- 559 20. *Implementation Research to improve quality of maternal and newborn health care, malawi*.  
560 Brenner, S., et al. 7, s.l. : <https://doi.org/10.2471/blt.16.178202>, 2017, Bulletin of the orld Health  
561 Organisation, Vol. 95, pp. 491-502.
- 562 21. *Performance Based Financing to strengthen the Health System in Benin: Challenging the*  
563 *mainstream approach*. Paul, E., et al. 1, s.l. : <https://doi.org/10.15171/ijhpm.2017.42>, 2017,  
564 International Journal of Health Policy and Management, Vol. 7, pp. 35-47.
- 565 22. *Effect on Maternal child health services in Rwanda of payment to primary health-care providers*  
566 *for performance: an impact evaluation*. Basinga, P., et al. 9775, s.l. : [https://doi.org/10.1016/s0140-](https://doi.org/10.1016/s0140-6736(11)60177-3)  
567 [6736\(11\)60177-3](https://doi.org/10.1016/s0140-6736(11)60177-3), 2011, The Lancet, Vol. 377, pp. 1412-1428.
- 568 23. *Using targeted vouchers and health equity funds to improve access to skilled birth attendants for*  
569 *poor women: A case study in three rural health districts in Cambodia*. Sabri, B., et al. 1, s.l. :  
570 <https://doi.org/10.1186/1471-2393-10-1>, 2007, BMC Pregnancy and Childbirth, Vol. 7.
- 571 24. *Using performance incentives to improve medical care productivity and health outcomes*. Gertler,  
572 P. J., Vermeersch, C. M. and Van, Der Gaag. 2015, National Bureau of Economic Research.
- 573 25. *Reviewing institutions of rural Health centers: the performance initiative in Butare, Rwanda*.  
574 Meessen, B., et al. 8, 2006, Tropical Medicine & international Health, Vol. 11, pp. 1303-1317. 1303-  
575 1317. doi:10.1111/j.1365-3156.2006.01680.x..
- 576 26. *HIV treatment in the private sector: An analysis of ART service delivery in Zambia*. Friedman, J., et  
577 al. 1, 2016, AIDS Research Therapy, Vol. 13, p. 25.
- 578 27. United Nations. *Transforming our world: the 2030 agenda for Sustainable Development*., New  
579 York:UN : s.n., 2015.
- 580 28. *Towards a coherent global framework for health financing: recommendations and recent*  
581 *developments*. Ottersen, T., et al. 2, s.l. : <https://doi.org/10.1017/S1744133116000505>., 2017, Health  
582 Economics policy law, Vol. 12, pp. 285-296.



- 583 29. *Setting performance-based financing in the health sector agenda: a case study in Cameroon.*  
584 *Globalization and Health.* Sieleunou, I., et al. 2017, p. 13.
- 585 30. *Incentives to change: Effects of performance-based financing on health in Zambia.* Shen, G., et al. 1,  
586 s.l. : <https://doi.org/10.1186/s12960-017-0179-2>, 2017, Human Resources for Health, Vol. 15.
- 587 31. *Performance-Based financing kick starts motivational "feedback loop": findings from a process*  
588 *evaluation in Mozambique.* Gergen, J., et al. 1, s.l. : <https://doi.org/10.1186/s12960-018-0320-x>, 2018,  
589 Human Resources for Health, Vol. 16.
- 590 32. *Can Performance based financing be used to reform health systems in developing countries?*  
591 Ireland, M., Paul, E. and Dujardin, B. 9, s.l. : <https://doi.org/10.2471/blt.11.087379>, 2011, Bulletin of  
592 the world health organisation, Vol. 89, pp. 695-698.
- 593 33. *Does training on performance based financing make a difference in performance and quality of*  
594 *health care delivery? health care provider's perspective in rungwe Tanzania.* Manongi, R., et al. 1, s.l. :  
595 <https://doi.org/10.1186/1472-6963-14-154>, 2014, BNC Health Services, Vol. 14.
- 596 34. *The importance of leadership and organisational capacity in shaping health workers' motivational*  
597 *reactions to performance-based financing: a multiple case study in Burkinafasé.* Fillol, A., et al. 5, s.l. :  
598 <https://doi.org/10.15171/ijhpm.2018.133>, 2019, International Journal of Health Policy and  
599 Management, Vol. 8, pp. 272-279.
- 600 35. *Performance-based financing for healthcare in the Northwest Region, Cameroon: A population-*  
601 *based study.* CIS. s.l. : <https://doi.org/10.131140/RG.2.2.23558.93124>, 2022, CIS report 2022-2.
- 602 36. RDPH. *Health system Performance in Northwest Region, Cameroon: A review of Progress Towards*  
603 *Universal Health Coverage.* NWR : RDPH , 2023.
- 604 37. *Socio-political crisis and healthcare access in Northwest Region, Cameroon: A qualitative study.*  
605 Bang, H. T. and Balgah, R. Z. 2, s.l. : <https://doi.org/10.1177/00207313221082942>, 2022, International  
606 Journal of Health, Vol. 52, pp. 237-248.
- 607 38. *Performance-Based Financing Toolkit.* World Bank. s.l. :  
608 [http://documents1.worldbank.org/curated/en/358251467994882004/pdf/940550v10WP0Box38535](http://documents1.worldbank.org/curated/en/358251467994882004/pdf/940550v10WP0Box385358B00PUBLIC0.pdf)  
609 [8B00PUBLIC0.pdf](http://documents1.worldbank.org/curated/en/358251467994882004/pdf/940550v10WP0Box385358B00PUBLIC0.pdf), 2015, World Bank.
- 610 39. INS. *Health Insurance Coverage in Cameroon: A Descriptive Analysis.* s.l. : INS report 2019-02, 2019.
- 611 40. *Health worker (internal customer) satisfaction and motivation in the public sector in Ghana.*  
612 Agyepong, L. A., et al. 2, s.l. : <https://doi.org/10.1002/hpm.770>, 2012, International Journal of Health  
613 Planning and Management, Vol. 27, pp. 163-177. <https://doi.org/10.1093/hpm.770>.
- 614 41. *English language proficiency as a barrier to understanding health information and services in*  
615 *Kenya: A study of the Kamba people of Kitui District.* Mbindyo, P., Blaauw, D. and Gilson, L. 5, 2009,  
616 Health Policy and Planning, Vol. 24, pp. 418-428.
- 617 42. *Physician distribution and retention in the public health sector of Ethiopia.* Assefa, T., et al. s.l. :  
618 <https://doi.org/10.2147/rmhp.s117943>, 2017, Risk Management and Healthcare Policy, Vol. 10, pp.  
619 17-29.

- 620 43. *Impact and determinants of nurse turnover: A pan-Canadian study*. O'Brien-Pallas, L., et al. 6, 2003,  
621 *Journal of Nursing Management*, Vol. 11, pp. 474-486.
- 622 44. *The deterioration of formal employment opportunities in the wake of the economic crisis in Zambia:  
623 A multi-level analysis of the determinants of health workers' choices*. Sasaki, S., et al. 4, 2018, *Health  
624 Policy and Planning*, Vol. 33, pp. 505-513.
- 625 45. *Operational readiness of public hospitals in northern Bangladesh to receive internally displaced  
626 persons: A cross-sectional study*. Hossain, S. M. M., et al. 1, 2019, *Conflict and Health*, Vol. 13, p. 33.
- 627 46. *Poverty and Health care: A review of the literature*. *Global Public Health*,. Cohen, J. 2, s.l. :  
628 <https://doi.org/10.1080/17441690500104042>, 2005, *Global Public Health*, Vol. 1.
- 629 47. *Getting health workers to rural areas: Innovative analytical approaches to inform policy  
630 implementation*. Vujcic, M., Alfano, M. and Shengelai, B. washington DC : World Bank, 2011.
- 631 48. *Population health and economic growth*. Barnighausen, T., et al. 7, s.l. :  
632 <https://doi.org/10.1016/j.worlddev.2003.07.002>, 2008, *World Development*, Vol. 36, pp. 987-1016.
- 633 49. *Health-care needs of people affected by conflict: Future trends and changing frameworks*. Spiegel,  
634 P. B., et al. 9711, 2014, *The Lancet*, Vol. 375, pp. 341-345.
- 635 50. *Assessing perceived quality of care as a predictor of health facility performance: A cross-sectional  
636 study of mid-level providers in Mozambique*. Bertone, M. P., et al. 6, s.l. :  
637 <https://doi.org/10.1371/journal.pone.0195301>, 2016, *PLoS ONE*, Vol. 11. e0155207.
- 638 51. Manga, L., et al. Performance based financing and Job Satisfaction in a Semi-urban health district  
639 in Cameroon. *Journal of Public Health in Africa*. s.l. : <https://doi.org/10.4081/jphia.2018.760>, 2018.
- 640 52. *Usability and acceptance of a mobile health wallet for pregnancy-related healthcare: a mixed  
641 methods study on stakeholders' perceptions in central madagascar*. Lacroze, E., et al. 1, s.l. :  
642 <https://doi.org/10.1371/journal.pone.0279880>, 2023, *PLoS ONE*, Vol. 18. e0279880.
- 643 53. *A mixed method exploration of health workers attitudes towards Performance Based Funding in  
644 Burkina Faso*. Lohmann, Julia, et al. 8, s.l. : PubMed Central, 2020, *international Journal of health and  
645 policy Management*, Vol. 10, pp. 483-494. 32610757.
- 646 54. *Person-Organisation Fit and the War for Talent: Does it Matter?* Ng, E. S. W. and Burke, R. J. 7,  
647 2005, *International journal of human resource Management*, Vol. 16, pp. 1195-1210.
- 648 55. *The Leadership Styles of Men and Women*. Eagly, A. H. and Johannesen-Schmidt, M. C. 4, 2001,  
649 *Journal of Social Issues*, Vol. 57, pp. 781-797.
- 650 56. *Work-Family Conflict, Policies, and job-life satisfaction Relationship: A review and Directions for  
651 future research*. Kossek, E. E. and Ozeki, C. 2, 1998, *Journal of Applied Psychology*, Vol. 83, pp. 139-  
652 149.
- 653 57. *Evaluating the quality of medical care*. Donabedian, A. 3, 1966, *The Milbank Memorial Fund  
654 Quaterly*, Vol. 44, pp. 166-206.

- 655 58. *Experiences of care in the context of payment for performance (P4P) in tanzania*. Chimutu, V.,  
656 Tjomsland, M. and Mrisho, M. 1, s.l. : <https://doi.org/10.1186/s12992-019-0503-9>, 2019,  
657 *Globalisation and Health*, Vol. 15.
- 658 59. Zitti, T., et al. *Does the gap between health workers' expectations and the realities of*  
659 *implementing a performance-based financing project in Mali create frustration?* s.l. :  
660 <https://doi.org/10.21203/rs.3.rs-54170/v3>, 2021.
- 661 60. *Reviewing institutions of rural health centres: The Performance Initiative in Butare, Rwanda*.  
662 Meessen, B., et al. 11, 2011, *Tropical Medicine and International Health*, Vol. 16, pp. 1439-1446.
- 663 61. *Analysis of Strategies to attract and retain rural health workers in Cambodia, China and Vietnam*  
664 *and context influencing their outcomes*. Zhu, A., et al. 1, s.l. : [https://doi.org/10.1186/s12960-018-](https://doi.org/10.1186/s12960-018-0340-6)  
665 0340-6, 2019, *Human Resources for Health*, Vol. 17.
- 666 62. *The effects of performance incentives on the utilization and quality of maternal and child care in*  
667 *Burundi*. Bonfrer, I., Van de Poel, E. and Van Doorslaer, E. 2014, *Social Science & Medicine*, Vol. 123,  
668 pp. 96-104.
- 669 63. *Effects of community performance-based financing on community health workers' service delivery in*  
670 *Kayanza health district, Burundi*. Gervais, M., Odongo, A. and Maima, A. 1, s.l. :  
671 <https://doi.org/10.18203/2394-6040.ijcmph20223521>, 2022, *International Journal of Community*  
672 *Medicine and Public Health*, Vol. 10, p. 21.
- 673 64. *Effects of performance-based financing on maternal care in 14 districts in Burundi*. Soeters, R.,  
674 Habineza, C. and Peerenboom, P. B. 2, 2006, *The international Journal of Health Planning and*  
675 *Management*, Vol. 26, pp. 214-226.
- 676 65. *Why performance-based financing is saving lives in Rwanda*. Sengooba, F., McPake, B. and Palmer,  
677 N. 3, s.l. : <https://doi.org/10.1093/inthealth/ihw024>, 3026, *International Journal of health*, Vol. 8, pp.  
678 161-166.
- 679 66. *Performance-based financing for better quality of services in Rwandan health centres: 3-year*  
680 *experience*. Rusa, L., et al. 7, s.l. : doi:10.1111/j.1365-3156.2009.02292.x., 2009, *Tropical Medicine and*  
681 *international Health TM IH*, Vol. 14, pp. 830-837.
- 682 67. *The Quality of Care: How can it be Assessed?* Donabedian, A. 12, 1988, *Journal of American Medical*  
683 *Association*, Vol. 260, pp. 1743-1748.
- 684 68. *incentives for quality improvement: the role of education in shaping perceptions of performance-*  
685 *based financing*. Austin, A. E. and Bowers, A. A. 2016, *BMC Health Services Research*, Vol. 16, p. 543.
- 686 69. *Transforming our world: The 2030 Agenda for Sustainable development*. United Nations. United  
687 Nations : s.n., 2018.
- 688 70. *Sources and focus of health development assistance, 1990-2014*. Dieleman, J. L. 23, 2016, *JAMA*,  
689 Vol. 313, pp. 2359-2368.

690 **TABLES**

691 **Table 1: Presentation of results related to variables in the study**

| <b>Variable</b>                   | <b>Before PBF n (%)</b> | <b>During PBF n (%)</b> | <b>P value</b> |
|-----------------------------------|-------------------------|-------------------------|----------------|
| <b>Type of employer</b>           |                         |                         | 0.062          |
| Government                        | 127 (40.3)              | 143 (45.4)              |                |
| Private                           | 154 (48.9)              | 126 (40.0)              |                |
| Confessional                      | 34 (10.8)               | 46 (14.6)               |                |
| <b>Category of HF</b>             |                         |                         | 0.019          |
| Health Centre                     | 76 (24.1)               | 57 (18.1)               |                |
| MHC                               | 55 (17.5)               | 39 (12.4)               |                |
| District Hospital                 | 129 (41.0)              | 141 (44.8)              |                |
| Regional Hospital                 | 55 (17.5)               | 78 (24.8)               |                |
| <b>Religion</b>                   |                         |                         | 0.046          |
| Christian                         | 297 (94.3)              | 290 (92.1)              |                |
| Muslim                            | 6 (1.9)                 | 17 (5.4)                |                |
| Other                             | 12 (3.8)                | 8 (2.5)                 |                |
| <b>Marital status</b>             |                         |                         | 0.607          |
| Married                           | 178 (56.5)              | 192 (61.0)              |                |
| Single                            | 124 (39.4)              | 109 (34.6)              |                |
| Divorced                          | 6 (1.9)                 | 5 (1.6)                 |                |
| Widow (er)                        | 7 (2.2)                 | 9 (2.9)                 |                |
| <b>Median Longevity (IQR)</b>     | 5 (3 – 9)               | 9 (7 – 12)              | <0.001         |
| <b>Longevity (years)</b>          |                         |                         | <0.001         |
| <5                                | 144 (45.7)              | 10 (3.2)                |                |
| 5 – 9                             | 104 (33.0)              | 181 (57.5)              |                |
| 10 – 14                           | 42 (13.3)               | 75 (23.8)               |                |
| 15 – 19                           | 21 (6.7)                | 32 (10.2)               |                |
| ≥20                               | 4 (1.3)                 | 17 (5.4)                |                |
| <b>Median Income (IQR)</b>        | 60k (50k – 95k)         | 75k (50k – 105k)        | 0.002          |
| <b>Average monthly income</b>     |                         |                         | 0.001          |
| < 50 000                          | 73 (23.2)               | 41 (13.0)               |                |
| 50 000 – 100 000                  | 176 (55.9)              | 195 (61.9)              |                |
| 100 001 – 200 000                 | 62 (19.7)               | 64 (20.3)               |                |
| >200 000                          | 4 (1.3)                 | 15 (4.8)                |                |
| <b>Media Household size (IQR)</b> | 5 (3 – 6)               | 5 (4 – 7)               | <0.001         |
| <b>Persons in household</b>       |                         |                         | <0.001         |
| < 4                               | 87 (27.6)               | 52 (16.5)               |                |
| 4 – 6                             | 175 (55.6)              | 173 (54.9)              |                |
| >6                                | 53 (16.8)               | 90 (28.6)               |                |

|                                            |                 |                 |        |
|--------------------------------------------|-----------------|-----------------|--------|
| <b>Median quote part<sup>1</sup> (IQR)</b> | 25k (10k – 35k) | 30k (20k – 45k) | <0.001 |
| <b>Average quote part</b>                  |                 |                 | 0.001  |
| < 25 000                                   | 152 (48.3)      | 104 (33.0)      |        |
| 25 000 – 50 000                            | 126 (40.0)      | 164 (52.1)      |        |
| 50 001 – 100 000                           | 32 (10.2)       | 38 (12.1)       |        |
| >100 000                                   | 5 (1.6)         | 9 (2.9)         |        |

692 **Table 2: Perception of Performance Based Financing**

| <b>Variables</b>                                                    | <b>Number</b> | <b>Percentage</b> |
|---------------------------------------------------------------------|---------------|-------------------|
| <b>How well have your expectations from PBF been met</b>            |               |                   |
| Very unsatisfied                                                    | 27            | 8.6               |
| Unsatisfied                                                         | 76            | 24.1              |
| Neutral                                                             | 105           | 33.3              |
| Satisfied                                                           | 82            | 26.0              |
| Very satisfied                                                      | 25            | 7.9               |
| <b>Describe your emotions/feelings during the PBF period</b>        |               |                   |
| Very unexcited                                                      | 18            | 5.7               |
| Unexcited                                                           | 52            | 16.5              |
| Neutral                                                             | 112           | 35.6              |
| Excited                                                             | 101           | 32.1              |
| Very excited                                                        | 32            | 10.2              |
| <b>How easy was it to implement and adapt to the PBF principles</b> |               |                   |
| Very difficult                                                      | 23            | 7.3               |
| Difficult                                                           | 93            | 29.5              |
| Neutral                                                             | 71            | 22.5              |
| Easy                                                                | 111           | 35.2              |
| Very easy                                                           | 17            | 5.4               |
| <b>How appropriate was PBF for the health field</b>                 |               |                   |
| Very inappropriate                                                  | 26            | 8.3               |
| Inappropriate                                                       | 39            | 12.4              |
| Neutral                                                             | 47            | 14.9              |
| Appropriate                                                         | 162           | 51.4              |
| Very appropriate                                                    | 41            | 13.0              |
| <b>How likely are you to recommend PBF in the future</b>            |               |                   |
| Very unlikely                                                       | 26            | 8.3               |
| Unlikely                                                            | 38            | 12.1              |
| Neutral                                                             | 35            | 11.1              |
| Likely                                                              | 142           | 45.1              |
| Very likely                                                         | 74            | 23.5              |

693 **Table 3: Perception Score**

| Overall Perception Score      | Number       | Percentage (95% CI) |
|-------------------------------|--------------|---------------------|
| Good ( $\geq 80\%$ )          | 62           | 19.7 (15.6 – 23.8)  |
| Poor (60%-79%)                | 169          | 53.7 (48.3 – 59.7)  |
| Very poor (<60%)              | 84           | 26.7 (21.9 – 31.4)  |
| Median Perception score (IQR) | 17 (14 – 19) |                     |
| Min – Max Score               | 5 – 25       |                     |

694 **Table 4: Factors associated with perception**

| Variables                 | Perception score   |               |               | P value |
|---------------------------|--------------------|---------------|---------------|---------|
|                           | Very poor<br>n (%) | Poor<br>n (%) | Good<br>n (%) |         |
| <b>Health District</b>    |                    |               |               | <0.001  |
| Bafut                     | 13 (52.0)          | 11 (44.0)     | 1 (4.0)       |         |
| Bali                      | 2 (10.5)           | 10 (52.6)     | 7 (36.8)      |         |
| Bamenda                   | 35 (26.5)          | 77 (58.3)     | 20 (15.2)     |         |
| Nkwen                     | 18 (45.0)          | 18 (45.0)     | 4 (10.0)      |         |
| Santa                     | 8 (16.7)           | 27 (56.3)     | 13 (27.1)     |         |
| Tubah                     | 8 (15.7)           | 26 (51.0)     | 17 (33.3)     |         |
| <b>Age groups</b>         |                    |               |               | 0.025   |
| <30                       | 15 (19.0)          | 55 (69.6)     | 9 (11.4)      |         |
| 30 – 39                   | 40 (33.6)          | 54 (45.4)     | 25 (21.0)     |         |
| 40 – 49                   | 25 (28.1)          | 43 (48.3)     | 21 (23.6)     |         |
| 50 – 59                   | 4 (16.7)           | 15 (62.5)     | 5 (20.8)      |         |
| $\geq 60$                 | 0 (0.0)            | 2 (50.0)      | 2 (50.0)      |         |
| <b>Sex</b>                |                    |               |               | 0.067   |
| Male                      | 26 (32.5)          | 34 (42.5)     | 20 (25.0)     |         |
| Female                    | 58 (24.7)          | 135 (57.4)    | 42 (17.9)     |         |
| <b>Level of education</b> |                    |               |               | 0.001   |
| Primary                   | 0 (0.0)            | 5 (45.5)      | 6 (54.5)      |         |
| Secondary                 | 18 (40.9)          | 14 (31.8)     | 12 (27.3)     |         |
| University                | 52 (26.1)          | 111 (55.8)    | 36 (18.1)     |         |
| Post graduate             | 14 (23.0)          | 39 (63.9)     | 8 (13.1)      |         |
| <b>Function</b>           |                    |               |               | <0.001  |
| Nurse                     | 43 (22.3)          | 109 (56.5)    | 41 (21.2)     |         |
| Lab Tech                  | 9 (34.6)           | 7 (26.9)      | 10 (38.5)     |         |
| Midwife                   | 15 (41.7)          | 21 (58.3)     | 0 (0.0)       |         |
| Biomed tech/Imaging       | 1 (33.3)           | 2 (66.7)      | 0 (0.0)       |         |
| Medical doctor            | 6 (75.0)           | 2 (25.0)      | 0 (0.0)       |         |
| <b>Auxiliary</b>          | 10 (20.4)          | 28 (57.1)     | 11 (22.4)     |         |

695 **Table 5: Effect of Performance Based Financing on Output**

| <b>Variables</b>                                    | <b>Before PBF n (%)</b> | <b>During PBF n (%)</b> | <b>P value</b> |
|-----------------------------------------------------|-------------------------|-------------------------|----------------|
| <b>General workload</b>                             |                         |                         | <0.001         |
| Very low                                            | 22 (7.0)                | 2 (0.6)                 |                |
| Low                                                 | 54 (17.1)               | 11 (3.5)                |                |
| Acceptable                                          | 157 (49.8)              | 91 (28.9)               |                |
| High                                                | 65 (20.6)               | 157 (49.8)              |                |
| Very High                                           | 17 (5.4)                | 54 (17.1)               |                |
| <b>Average number of patients consulted monthly</b> |                         |                         | <0.001         |
| Very low                                            | 5 (1.6)                 | 0 (0.0)                 |                |
| Low                                                 | 42 (13.3)               | 2 (0.6)                 |                |
| Acceptable                                          | 130 (41.3)              | 67 (21.3)               |                |
| High                                                | 111 (35.2)              | 168 (53.3)              |                |
| Very High                                           | 27 (8.6)                | 78 (24.8)               |                |
| <b>Average number of patients admitted monthly</b>  |                         |                         | <0.001         |
| Very low                                            | 12 (3.8)                | 0 (0.0)                 |                |
| Low                                                 | 43 (13.7)               | 4 (1.3)                 |                |
| Acceptable                                          | 156 (49.5)              | 111 (35.2)              |                |
| High                                                | 88 (27.9)               | 118 (37.5)              |                |
| Very High                                           | 16 (5.1)                | 82 (26.0)               |                |
| <b>Average number of monthly deliveries</b>         |                         |                         | <0.001         |
| Very low                                            | 13 (4.1)                | 5 (1.6)                 |                |
| Low                                                 | 63 (20.0)               | 14 (4.4)                |                |
| Acceptable                                          | 136 (43.2)              | 102 (32.4)              |                |
| High                                                | 84 (26.7)               | 131 (41.6)              |                |
| Very High                                           | 19 (6.0)                | 63 (20.0)               |                |
| <b>Number of monthly community interventions</b>    |                         |                         | <0.001         |
| Very low                                            | 13 (4.1)                | 1 (0.3)                 |                |
| Low                                                 | 104 (33.0)              | 36 (11.4)               |                |
| Acceptable                                          | 130 (41.3)              | 119 (37.8)              |                |
| High                                                | 51 (16.2)               | 112 (35.6)              |                |
| Very High                                           | 17 (5.4)                | 47 (14.9)               |                |
| <b>Average monthly financial incentives</b>         |                         |                         | <0.001         |
| Very low                                            | 66 (21.0)               | 38 (12.1)               |                |
| Low                                                 | 128 (40.6)              | 62 (19.7)               |                |
| Acceptable                                          | 90 (28.6)               | 111 (35.2)              |                |
| High                                                | 23 (7.3)                | 80 (25.4)               |                |
| Very High                                           | 8 (2.5)                 | 24 (7.6)                |                |
| <b>Monthly mortality rate</b>                       |                         |                         | 0.055          |

|                   |            |            |        |
|-------------------|------------|------------|--------|
| <b>Very low</b>   | 109 (34.6) | 121 (38.4) |        |
| <b>Low</b>        | 102 (32.4) | 90 (28.6)  |        |
| <b>Acceptable</b> | 63 (20.0)  | 51 (16.2)  |        |
| <b>High</b>       | 33 (10.5)  | 31 (9.8)   |        |
| <b>Very High</b>  | 8 (2.5)    | 22 (7.0)   |        |
| <b>Overtime</b>   |            |            | <0.001 |
| <b>Very low</b>   | 29 (9.2)   | 14 (4.4)   |        |
| <b>Low</b>        | 61 (19.4)  | 34 (10.8)  |        |
| <b>Acceptable</b> | 123 (39.0) | 79 (25.1)  |        |
| <b>High</b>       | 61 (19.4)  | 109 (34.6) |        |
| <b>Very High</b>  | 41 (13.0)  | 79 (25.1)  |        |

696 **Table 6: Effect of Performance based Financing on Healthcare Quality**

| <b>Variables</b>                        | <b>Before PBF n (%)</b> | <b>During PBF n (%)</b> | <b>P value</b> |
|-----------------------------------------|-------------------------|-------------------------|----------------|
| <b>Approximate patient waiting time</b> |                         |                         | <0.001         |
| Less than 30 mins                       | 112 (35.6)              | 176 (55.9)              |                |
| 30 – 60 mins                            | 122 (38.7)              | 95 (30.2)               |                |
| Greater than 60 mins                    | 81 (25.7)               | 44 (14.0)               |                |
| <b>Cleanliness of the hospital</b>      |                         |                         | <0.0001        |
| Very dirty                              | 51 (16.2)               | 1 (0.3)                 |                |
| Dirty                                   | 63 (20.0)               | 7 (2.2)                 |                |
| Acceptable                              | 81 (25.7)               | 33 (10.5)               |                |
| Clean                                   | 82 (26.0)               | 116 (36.8)              |                |
| Very clean                              | 38 (12.1)               | 158 (50.2)              |                |
| <b>Equity of care</b>                   |                         |                         | <0.001         |
| Very low                                | 16 (5.1)                | 0 (0.0)                 |                |
| Low                                     | 46 (14.6)               | 4 (1.3)                 |                |
| Acceptable                              | 131 (41.6)              | 80 (25.4)               |                |
| High                                    | 69 (21.9)               | 136 (43.2)              |                |
| Very high                               | 53 (16.8)               | 95 (30.2)               |                |
| <b>Assiduity</b>                        |                         |                         | <0.001         |
| <b>Very low</b>                         | 23 (7.3)                | 0 (0.0)                 |                |
| <b>Low</b>                              | 51 (16.2)               | 10 (3.2)                |                |
| <b>Acceptable</b>                       | 144 (45.7)              | 72 (22.9)               |                |
| <b>High</b>                             | 74 (23.5)               | 144 (45.7)              |                |
| <b>Very high</b>                        | 23 (7.3)                | 89 (28.3)               |                |
| <b>Quality of patient reception</b>     |                         |                         | <0.001         |
| <b>Very low</b>                         | 18 (5.7)                | 10 (3.2)                |                |
| <b>Low</b>                              | 61 (19.4)               | 2 (0.6)                 |                |



|                                           |            |            |        |
|-------------------------------------------|------------|------------|--------|
| <b>Acceptable</b>                         | 137 (43.5) | 80 (25.4)  |        |
| <b>High</b>                               | 76 (24.1)  | 139 (44.1) |        |
| <b>Very high</b>                          | 23 (7.3)   | 84 (26.7)  |        |
| <b>Self-efficacy (work confidence)</b>    |            |            | <0.001 |
| <b>Very low</b>                           | 14 (4.4)   | 2 (0.6)    |        |
| <b>Low</b>                                | 46 (14.6)  | 10 (3.2)   |        |
| <b>Acceptable</b>                         | 135 (42.9) | 62 (19.7)  |        |
| <b>High</b>                               | 76 (24.1)  | 142 (45.1) |        |
| <b>Very high</b>                          | 44 (14.0)  | 99 (31.4)  |        |
| <b>Infrastructural development</b>        |            |            | <0.001 |
| <b>Very low</b>                           | 25 (7.9)   | 13 (4.1)   |        |
| <b>Low</b>                                | 63 (20.0)  | 15 (4.8)   |        |
| <b>Acceptable</b>                         | 119 (37.8) | 44 (14.0)  |        |
| <b>High</b>                               | 44 (14.0)  | 134 (42.5) |        |
| <b>Very high</b>                          | 64 (20.3)  | 109 (34.6) |        |
| <b>Patient extortion and embezzlement</b> |            |            | <0.001 |
| <b>Very low</b>                           | 108 (34.3) | 165 (52.4) |        |
| <b>Low</b>                                | 79 (25.1)  | 83 (26.3)  |        |
| <b>Acceptable</b>                         | 47 (14.9)  | 37 (11.7)  |        |
| <b>High</b>                               | 60 (19.0)  | 20 (6.3)   |        |
| <b>Very high</b>                          | 21 (6.7)   | 10 (3.2)   |        |

697 Source: Researcher, 2023

698

699 **Table 7: Overall healthcare quality score for periods before and during the implementation of the**  
700 **Performance Based Financing Project**

| <b>Quality score</b>              | <b>Before PBF<br/>n (%)</b> | <b>During PBF<br/>n (%)</b> | <b>P value</b> |
|-----------------------------------|-----------------------------|-----------------------------|----------------|
| <b>Good (≥ 80%)</b>               | 56 (17.8)                   | 187 (59.4)                  | <0.001         |
| <b>Poor (60% - 79%)</b>           | 132 (41.9)                  | 114 (36.2)                  |                |
| <b>Very poor (&lt; 60%)</b>       | 127 (40.3)                  | 14 (4.4)                    |                |
| <b>Median Quality score (IQR)</b> | 25 (21 – 29)                | 32 (28 – 34)                | <0.001         |

701 Source: Researcher, 2023

702
